# Supplementary material for: Lanthanide doped Bi2O3 upconversion luminescence nanospheres for temperature sensing and optical imaging
Source: Royal Society of Chemistry journal article supplement (doi:10.1039/c5dt04279h), 2015-12-23
Supplement: c5dt04279h1.pdf [file c5dt04279h1.pdf]

## Supporting Information

### **Lanthanide doped Bi<sub>2</sub>O<sub>3</sub> upconversion luminescence nanospheres for temperature sensing and optical imaging**

Pengpeng Lei,<sup>ab</sup> Xiuling Liu,<sup>a</sup> Lile Dong,<sup>ab</sup> Zhuo Wang,<sup>ab</sup> Shuyan Song,<sup>a</sup> Xia Xu,<sup>ab</sup>  
Yue Su,<sup>ab</sup> Jing Feng\*<sup>a</sup> and Hongjie Zhang\*<sup>a</sup>

*<sup>a</sup>State Key Laboratory of Rare Earth Resource Utilization, Changchun Institute of Applied Chemistry, Chinese Academy of Sciences, 5625 Renmin Street, Changchun 130022, China. E-mail: fengj@ciac.ac.cn, hongjie@ciac.ac.cn; Fax: +86-431-85698041; Tel: +86-431-85262127*

*<sup>b</sup>University of Chinese Academy of Sciences, Beijing 100049, China*

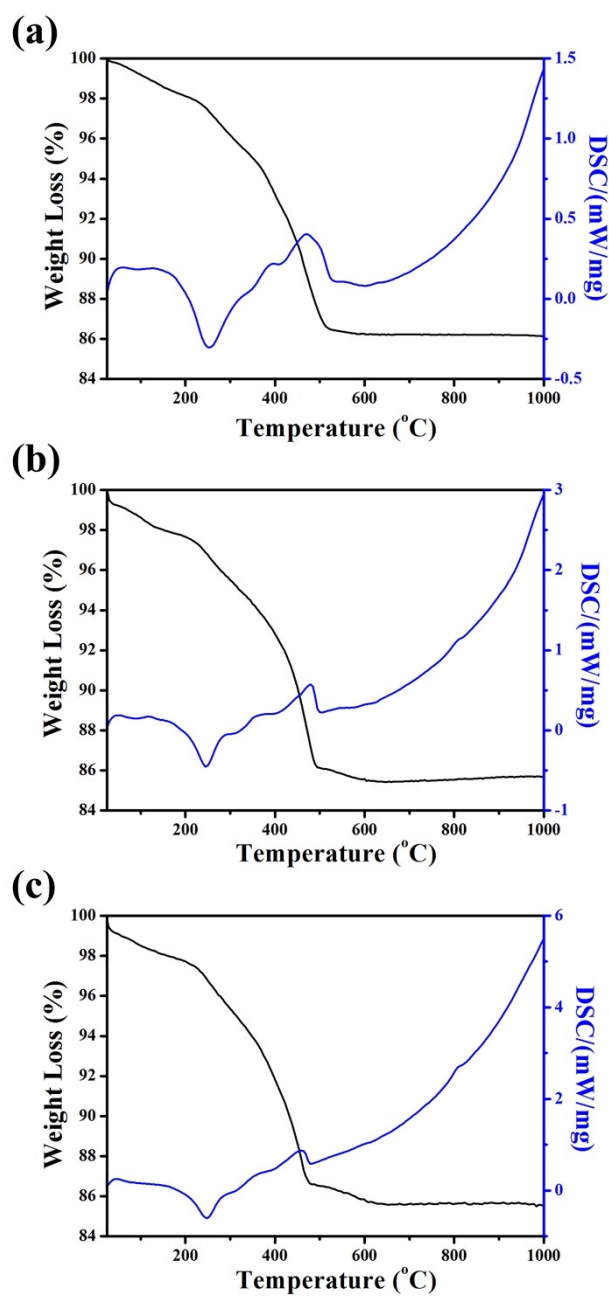

**Fig. S1** TG-DSC curves of the precursor samples. (a)  $\text{Bi}_2\text{O}_2\text{CO}_3:\text{Yb}^{3+}/\text{Er}^{3+}$ , (b)  $\text{Bi}_2\text{O}_2\text{CO}_3:\text{Yb}^{3+}/\text{Ho}^{3+}$ , (c)  $\text{Bi}_2\text{O}_2\text{CO}_3:\text{Yb}^{3+}/\text{Tm}^{3+}$ .

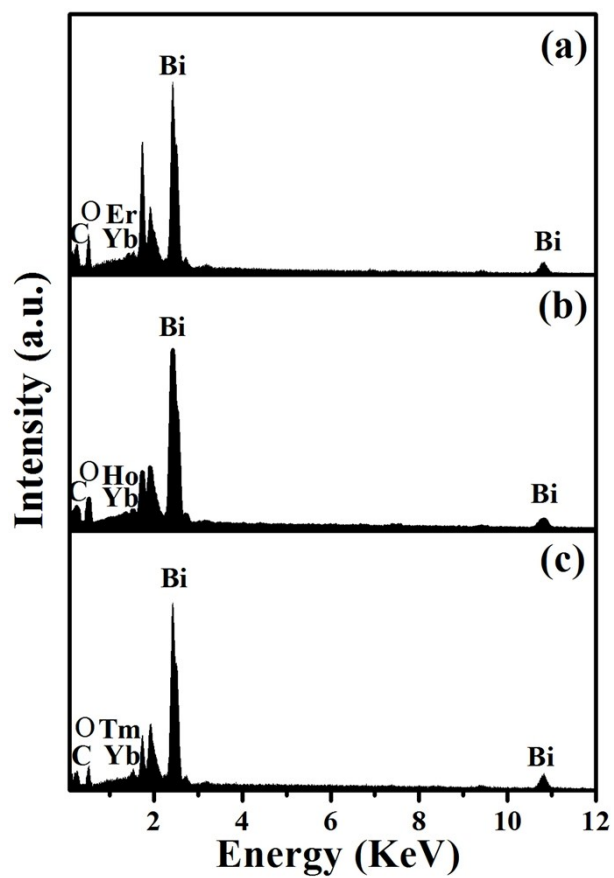

**Fig. S2** X-ray Energy-dispersive (EDX) spectroscopy of the precursor samples. (a)  $\text{Bi}_2\text{O}_2\text{CO}_3:\text{Yb}^{3+}/\text{Er}^{3+}$ , (b)  $\text{Bi}_2\text{O}_2\text{CO}_3:\text{Yb}^{3+}/\text{Ho}^{3+}$ , (c)  $\text{Bi}_2\text{O}_2\text{CO}_3:\text{Yb}^{3+}/\text{Tm}^{3+}$ .

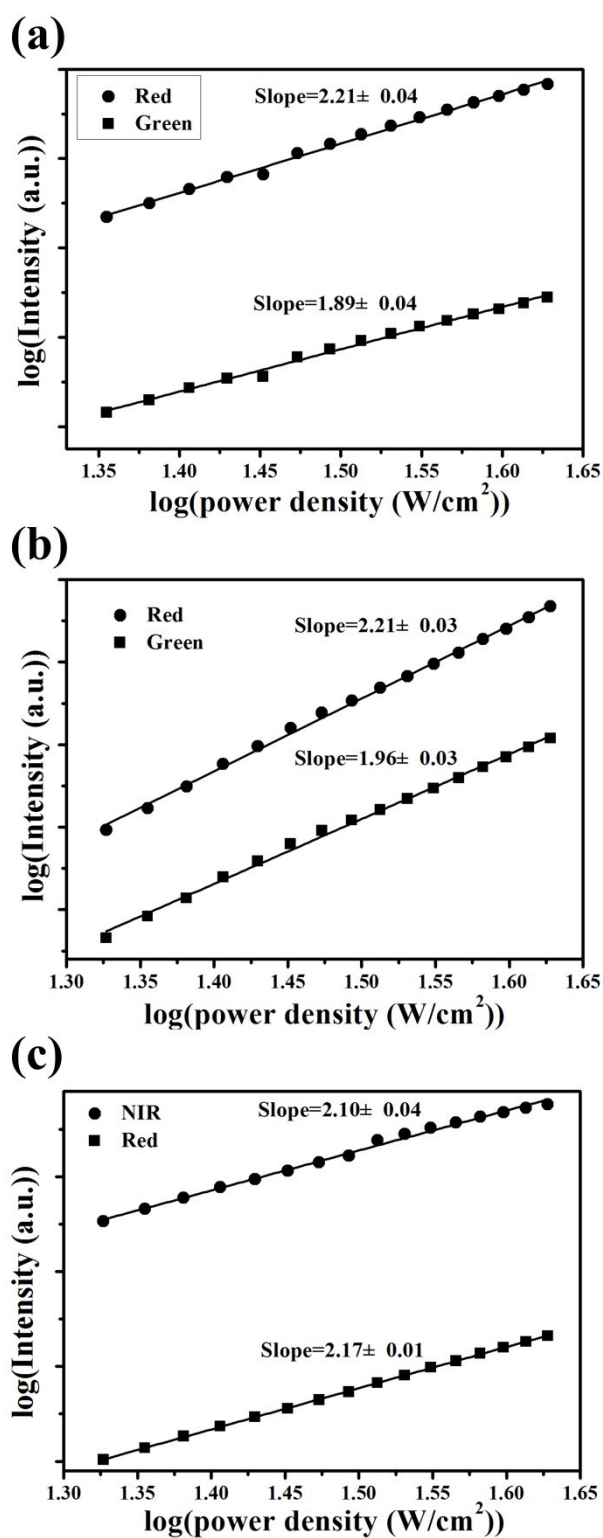

**Fig. S3** Pump power dependence of the (a) red and green UCL intensities of Bi<sub>2</sub>O<sub>3</sub>:Yb<sup>3+</sup>/Er<sup>3+</sup> nanospheres obtained at 700 °C, (b) red and green UCL intensities of Bi<sub>2</sub>O<sub>3</sub>:Yb<sup>3+</sup>/Ho<sup>3+</sup> nanospheres obtained at 700 °C, (c) NIR and red UCL intensities of Bi<sub>2</sub>O<sub>3</sub>:Yb<sup>3+</sup>/Tm<sup>3+</sup> nanospheres obtained at 700 °C excited by 980 nm laser.
